# Supplementary material
Source: PubMed Central journal article supplement (PMC4981125)
Supplement: supp_tpc.15.00870_TPC2015-00870-RAR2_Supplemental_Data.pdf [file supp_tpc.15.00870_TPC2015-00870-RAR2_Supplemental_Data.pdf]

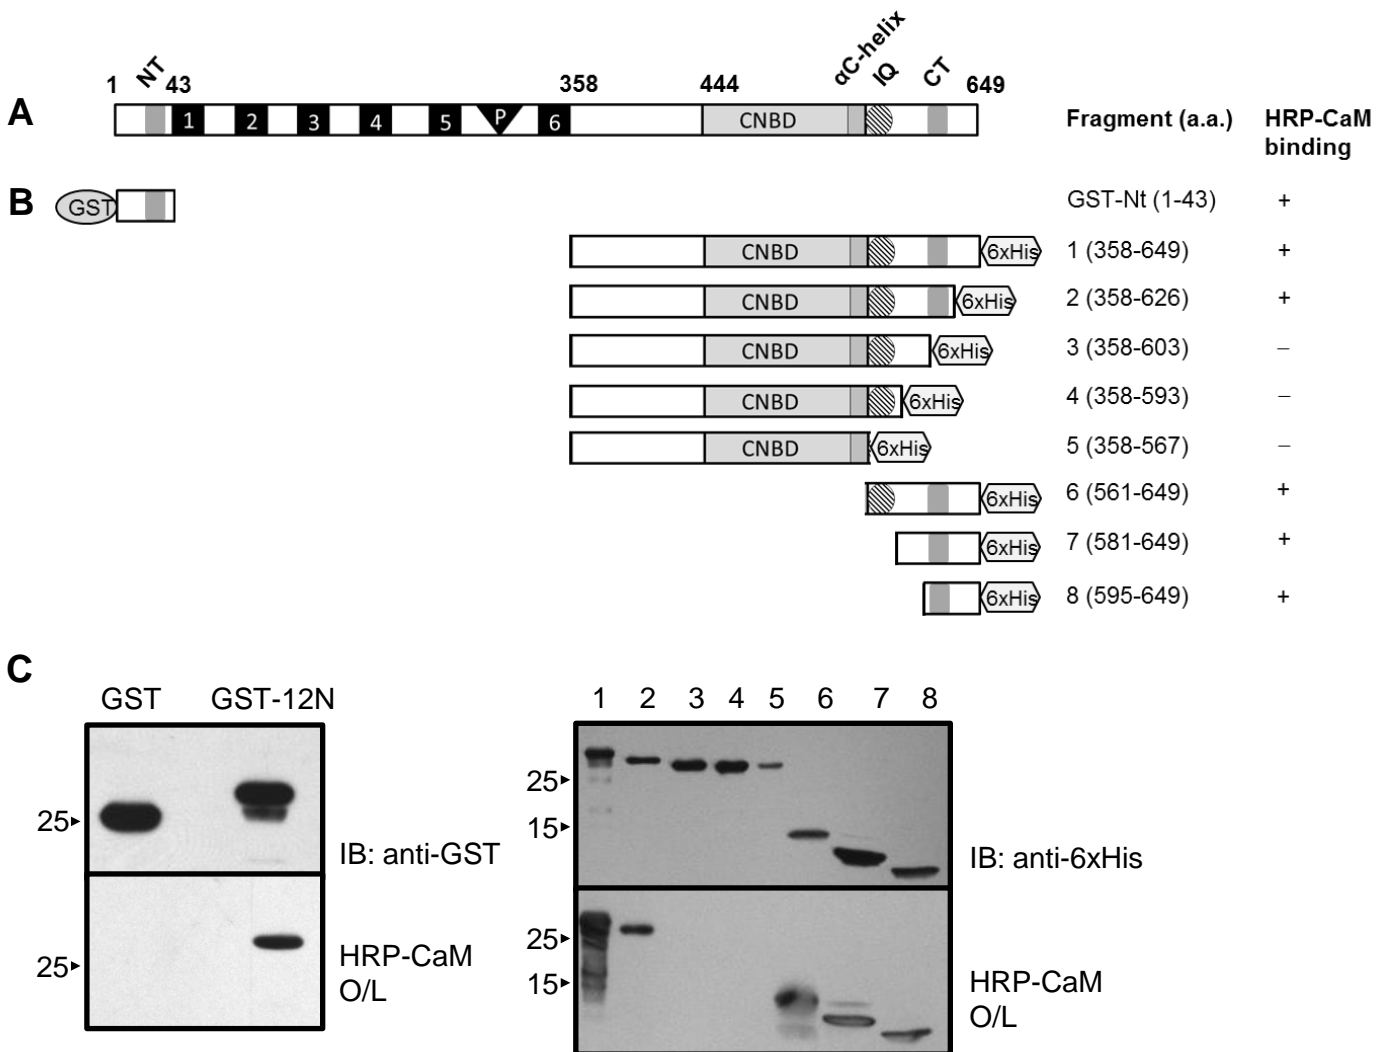

**Supplemental Figure 1. N- and C-terminal regions of CNGC12 possess CaMBDs.** (A), Domain organization of CNGC12. The location of six TM helices (1-6), pore-forming region (P), CNBD,  $\alpha$ -C-helix, and IQ motif were determined based on sequence alignment. Locations of the NT and CT motifs were determined in the present study. (B) Summary of *in vitro* CaM-binding assays shown in (C). Fragments representing different regions of CNGC12 (as indicated by a.a. numbers) were recombinantly expressed as fusion proteins and subjected to HRP-CaM overlay assays. Fragments that produced a band in a HRP-CaM overlay (O/L) assay (C) are indicated with +. (C) Expression and CaM-binding of CNGC12 fusion proteins were determined via immunoblot (IB) (top panels) and HRP-CaM overlay (bottom panels), respectively.

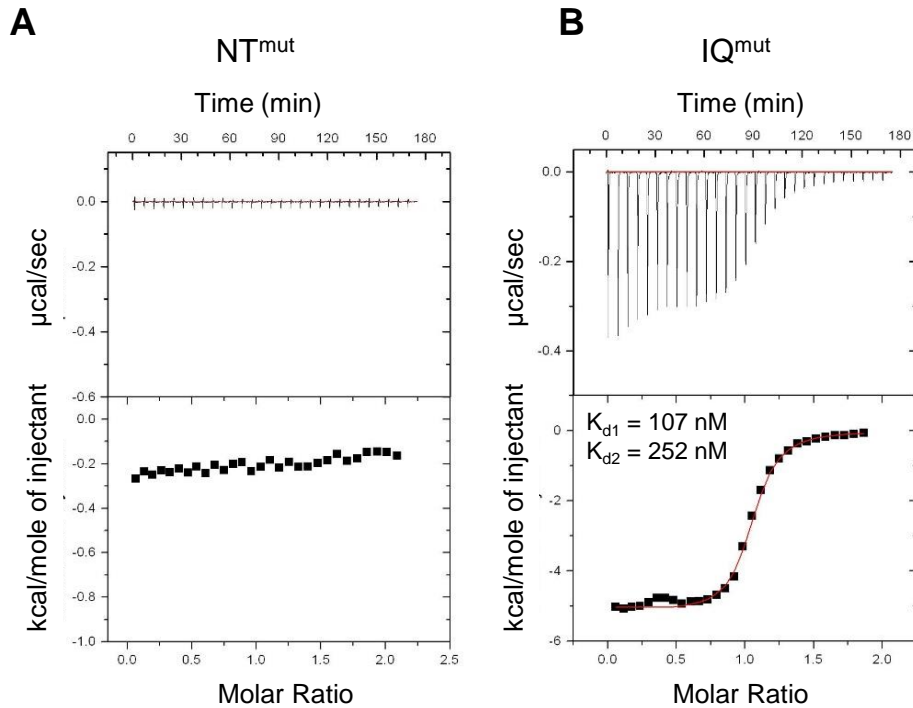

**Supplemental Figure 2. ITC analysis of the NT<sup>mut</sup> (L27E/K28E) and IQ<sup>mut</sup> (I672D/Q573A) peptides.** Data were collected, analyzed, and presented as outlined in Figure 3. **(A)** 150 μM NT<sup>mut</sup> peptide was titrated into 16 μM CaM81. No binding was measured. **(B)** 140 μM IQ<sup>mut</sup> peptide was titrated into 16 μM CaM81. The data were best fitted to a two-site model, with calculated  $K_d$  values of 107 and 252 nM.

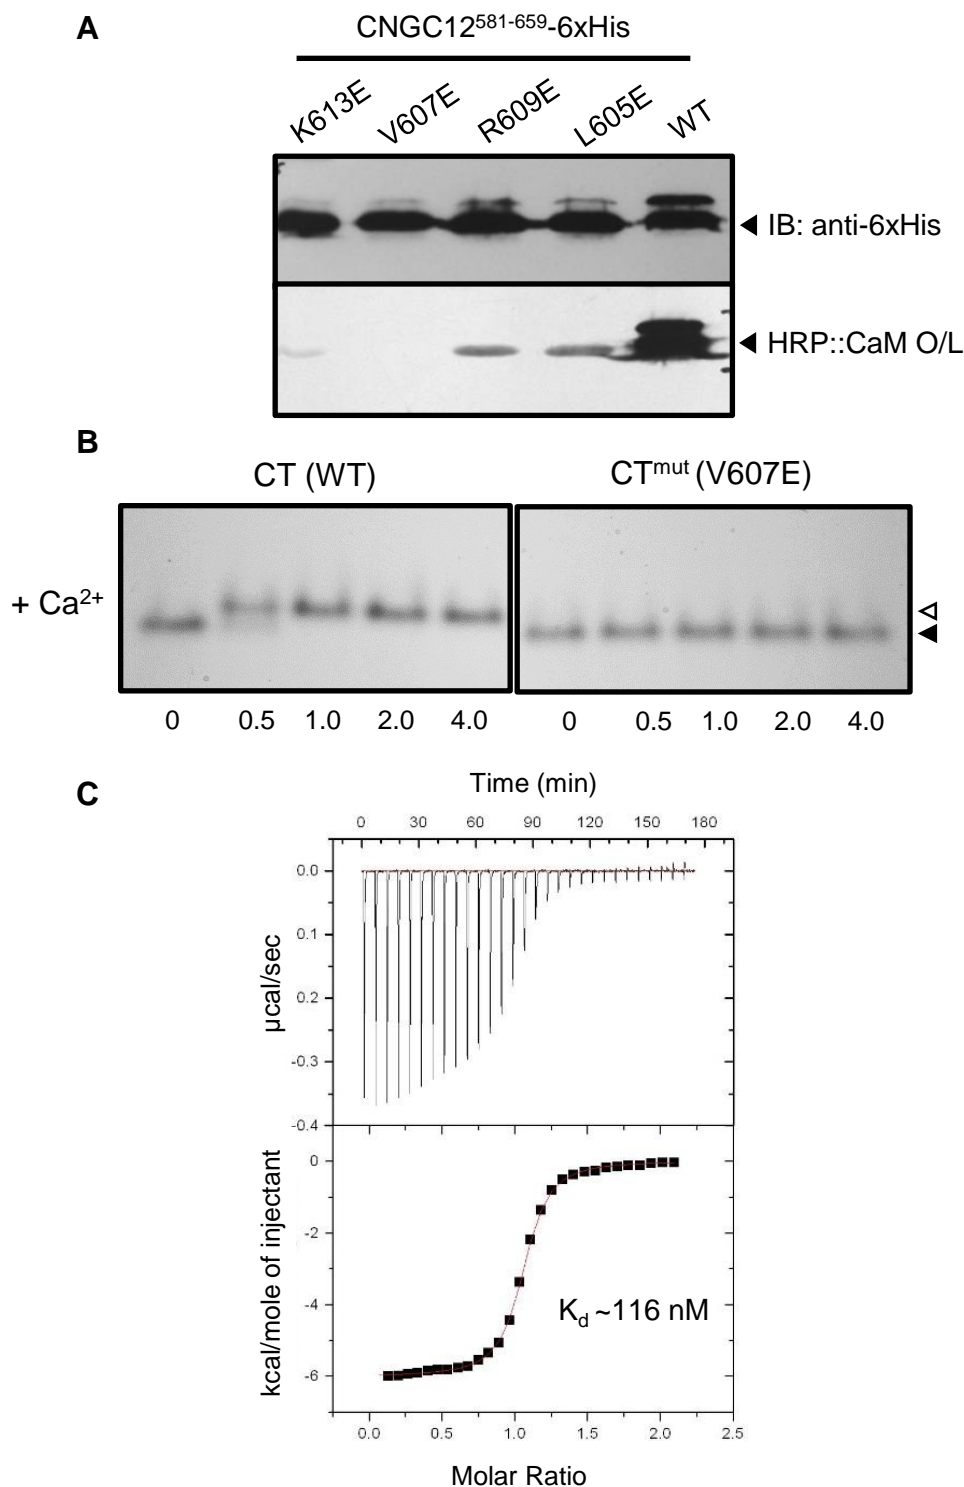

**Supplemental Figure 3. The V607E mutation disrupts CaM-binding to the CT motif.** (A) C-terminal fragments corresponding to a.a. 581-649 of CNGC12 featuring individual point mutations were expressed as 6xHis-tagged recombinant proteins and assayed for HRP-CaM-binding. (B) Ca<sup>2+</sup>/CaM ND-PAGE assay with CT and Ctm<sup>ut</sup> peptides. Closed and open arrows indicate the migration of CaM and CaM-peptide complex, respectively. Numbers indicate the molar ratio of peptide:CaM. (C) ITC analysis of CT<sup>mut</sup> peptide binding to Ca<sup>2+</sup>/CaM. 150 µM CT<sup>mut</sup> peptide was titrated into 16 µM CaM81, and data were analyzed as described in Figure 3. A K<sub>d</sub> value of 116 nM was calculated from measurements, which corresponds to an approximately 16-fold decrease in affinity compared to the WT CT peptide.

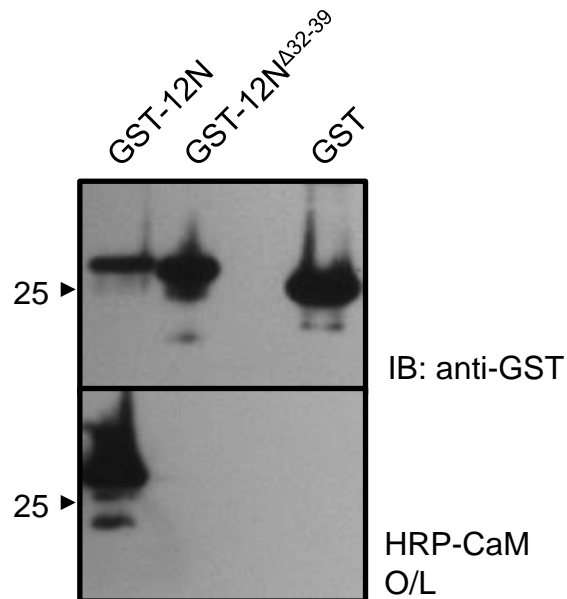

**Supplemental Figure 4. The  $\Delta$ 8 mutation (CNGC12 a.a. 32-39) disrupts the CaM-binding to the N-terminus of CNGC12.** The N-terminus (representing CNGC12 a.a. 1-43) of WT or mutant CNGC12 was expressed recombinantly and assayed for CaM-binding with 50 nM HRP-CaM in the presence of 1 mM  $\text{CaCl}_2$ .

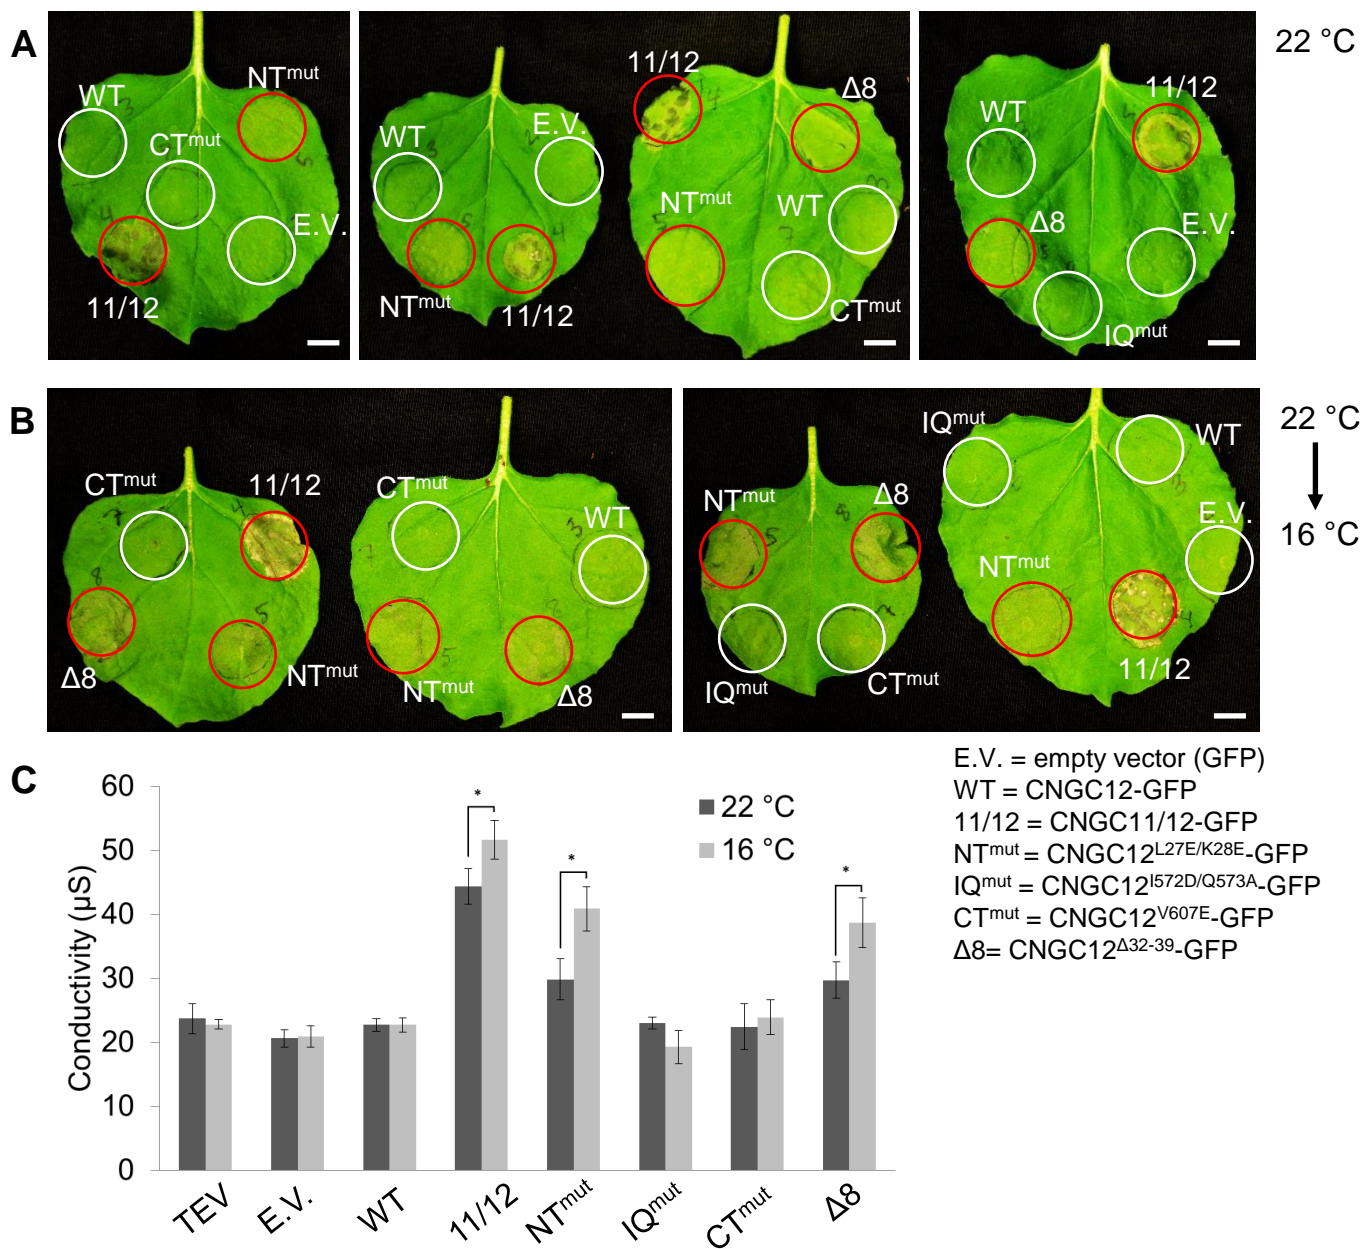

**Supplemental Figure 5. PCD induction by NT mutants is increased at lower temperature.** *N. benthamiana* leaves were infiltrated at 22 °C and left at 22 °C or shifted to 16 °C 24 hpi. Areas were infiltrated with HC-Pro from TEV alone (TEV) or co-infiltrated with GFP-tagged constructs labeled as indicated in the legend. **(A and B)** *N. benthamiana* leaves 4 dpi at 22 °C **(A)** or 16 °C **(B)**. Scale bars = 1 cm. **(C)** Conductivity of regions expressing CNGC11/12 or NT mutants (NT<sup>mut</sup> or Δ8) was significantly increased at 16 °C relative to 22 °C (\* represents p<0.05, student's t-test). Values shown are averages of three replicates (error bars = standard deviation).

A

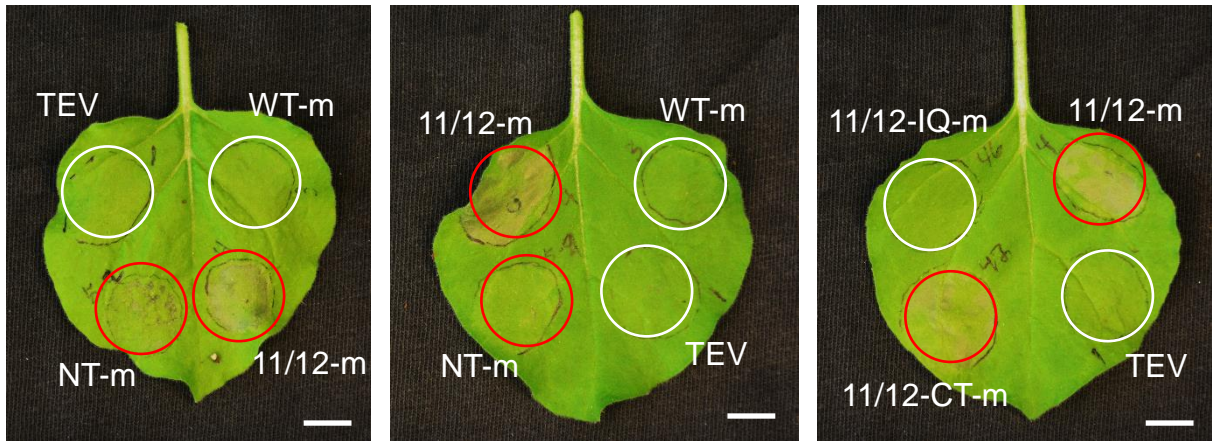

B

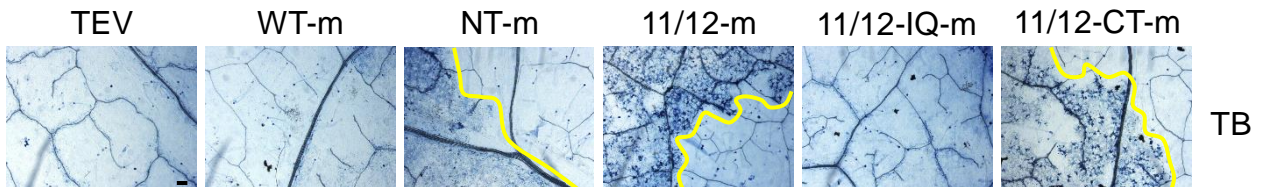

**Supplemental Figure 6. Phenotypic analysis of myc-tagged CNGC12 construct expression in *N. benthamiana*.** Areas were infiltrated with the HC-Pro construct alone (TEV) or co-infiltrated with TEV and constructs: WT-m : CNGC12-myc, NT-m : CNGC12<sup>L27E/K28E</sup>-myc, 11/12-m : CNGC11/12-myc, 11/12-IQ-m : CNGC11/12<sup>I564D/Q565A</sup>-myc, 11/12-CT-m : CNGC11/12<sup>V599E</sup>-myc. Experiments were performed as described for Figures 6 and 7, and results are shown 4 dpi. **(A)** Phenotypes of leaves 4 dpi. Red circles indicate areas showing visible signs of PCD. Scale bar = 1 cm. **(B)** Trypan blue (TB) staining for cell death. Yellow lines indicate the border of infiltrated vs uninfiltrated areas. Scale bar = 0.1 mm.

IQ peptide

AAFFIQAAWRKHCKRKLKTR

Ext. IQ peptide

RLYSQQWR<sup>R</sup>SWAAFFIQAAWRKHCKR

Ext. S58 peptide

RLYSQQW<sup>C</sup>SWAAFFIQAAWRKHCKR**A**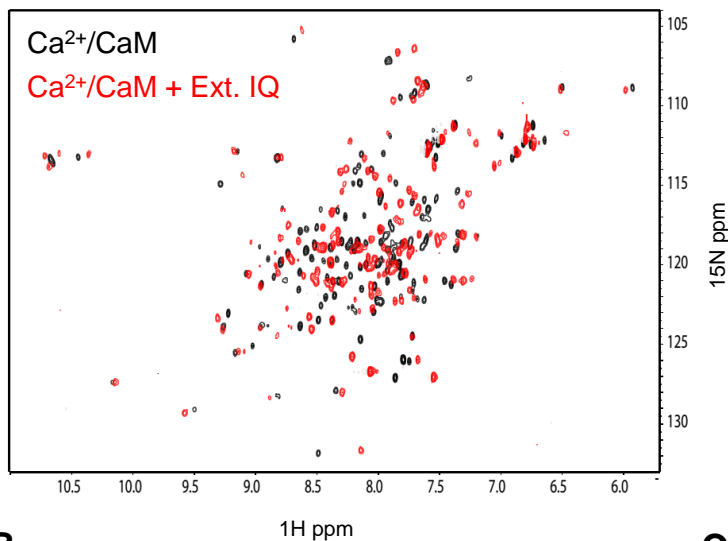**B**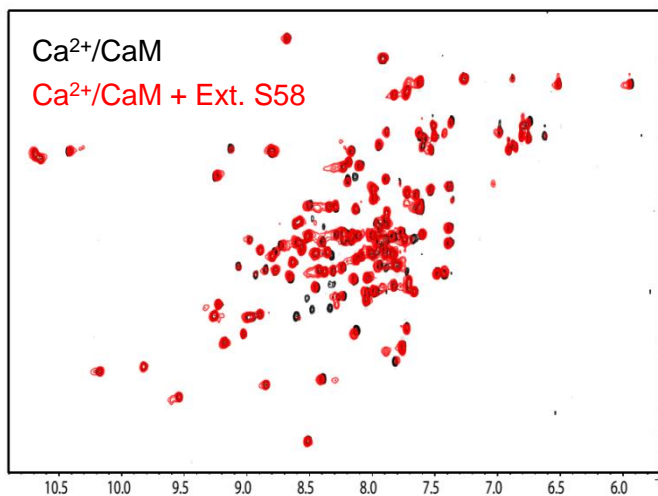**C**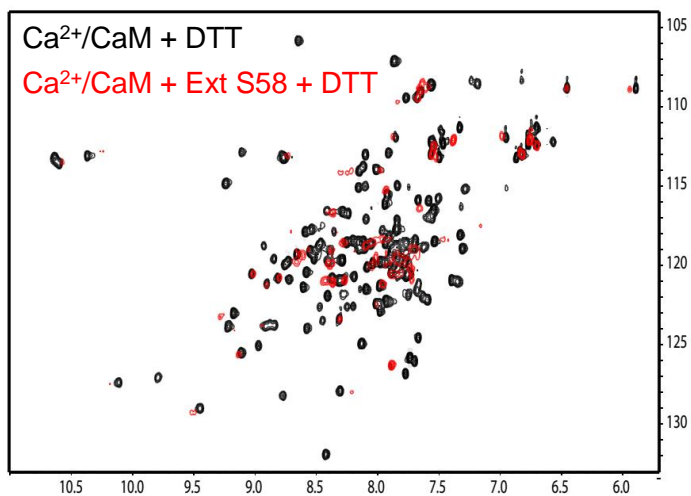

**Supplemental Figure 7. The S58 mutant of CNGC11/12 (R577C) partially disrupts CaM-binding to the IQ motif.** Spectra of 0.2 mM <sup>15</sup>N-CaM in 10 mM Tris-Cl, 150 mM NaCl, 10 mM CaCl<sub>2</sub>, pH 7.5 in the absence (**A** and **B**) or presence of 5 mM DTT. Overlaid spectra are shown for CaM alone (black) and CaM in the presence of equimolar peptide, as indicated. (**A**) The WT extended peptide induces a shift in <sup>15</sup>N-CaM spectra indicative of interaction. (**B**) The S58 peptide induces only minor changes in the spectra of <sup>15</sup>N-CaM under normal conditions, suggesting this peptide cannot bind CaM; however binding can be partially restored under reducing conditions (**C**).

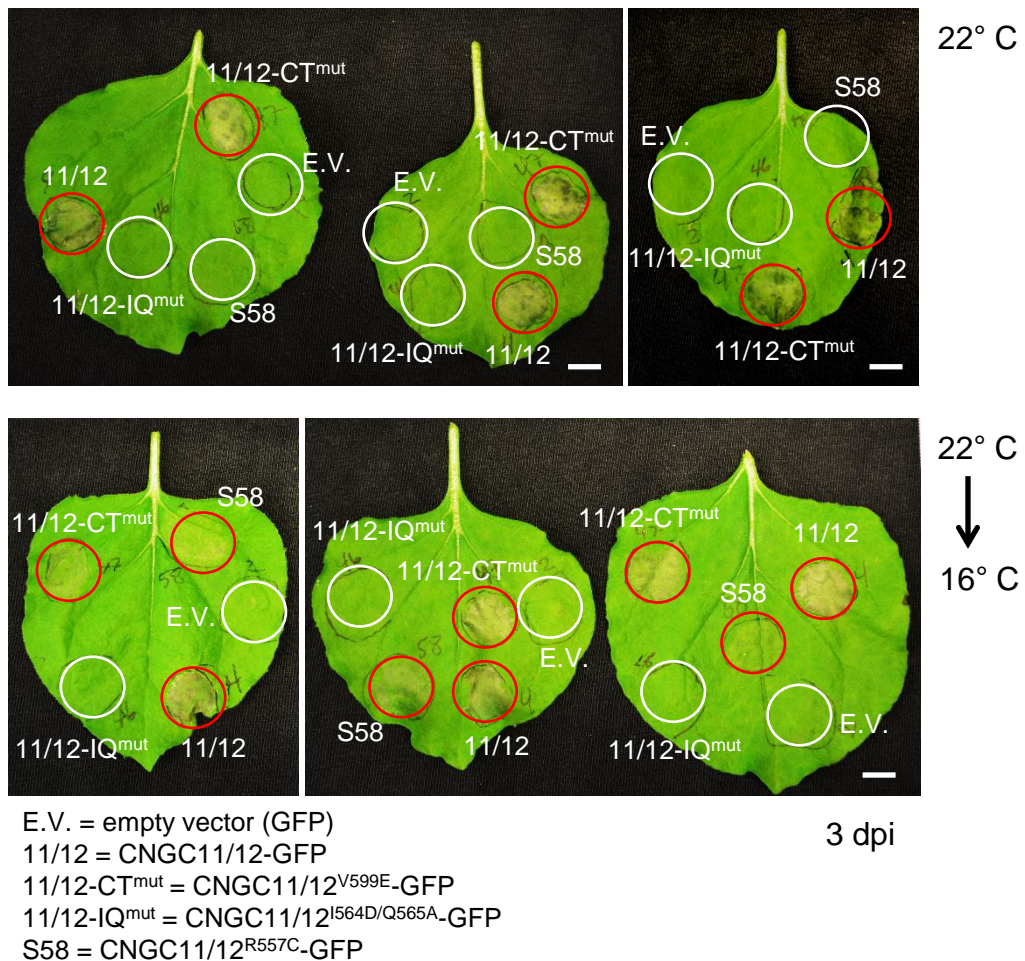

**Supplemental Figure 8. Low temperature does not restore PCD-induction by CNGC11/12-IQ<sup>mut</sup>.** *N. benthamiana* leaves were infiltrated at 22° C with Agrobacterium carrying constructs as labeled in figure legend. For temperature shift, plants were moved 24 hpi into a 16° C growth chamber. Images show leaves 3 dpi (48 h at 16° C). Areas showing PCD are circled in red. Scale bar = 1 cm.



**Supplemental Table 1. CNGC12 CaMBD peptides.** Position refers to the a.a. sequence of CNGC12 corresponding to each peptide. Mutations are bolded.

| <b>Name</b>       | <b>Position</b> | <b>Sequence</b>                    |
|-------------------|-----------------|------------------------------------|
| NT                | 16-40           | VDGKLSVRGRLKKVYGKMKTLLENW          |
| NT <sup>mut</sup> | 16-40           | VDGKLSVRGR <b>EE</b> KVYGKMKTLLENW |
| IQ                | 568-588         | AAFFIQAAWRKHCKRRLSKTR              |
| IQ <sup>mut</sup> | 568-588         | AAFF <b>DA</b> AWRKHCKRRLSKTR      |
| CT                | 600-623         | NLASTLYVSRFVSKALQNRKDTA            |
| CT <sup>mut</sup> | 600-623         | NLASTLY <b>E</b> SRFVSKALQNRKDTA   |

All peptides used for biophysical analyses of CaM-binding (ITC or NMR) were synthesized to high purity (>90%) by GenScript (Piscataway, NJ, USA) or Peptide 2.0 (Chantilly, VA, USA).

**Supplemental Table 2. Calculated parameters from ITC measurements.** Values correspond to isotherms shown in Figure 3. The stoichiometry ( $N$ , no. sites/mol), binding constant ( $K$ , in cal/mol), heat change ( $\Delta H$ , in cal/mol), and entropy change ( $\Delta S$ , in cal/mol) are shown for each modeled binding site.

| Parameter  | NT + Ca <sup>2+</sup> /CaM | IQ + Ca <sup>2+</sup> /CaM                                     | CT + Ca <sup>2+</sup> /CaM | IQ + apoCaM      |
|------------|----------------------------|----------------------------------------------------------------|----------------------------|------------------|
| $N$        | 0.9485 ±0.002059           | <sub>1</sub> 0.4767 ±0.03102<br><sub>2</sub> 0.4879 ±0.0342    | 0.9487 ±0.001604           | 0.9861 ±0.003099 |
| $K$        | 3.105E7 ±2.542E6           | <sub>1</sub> 5.637E7 ±2.224E7<br><sub>2</sub> 1.186E7 ±1.372E6 | 2.548E8 ±4.642E7           | 1.048E6 ±3.054E4 |
| $\Delta H$ | -1.118E4 ±45.72            | <sub>1</sub> -2328 ±409.4<br><sub>2</sub> -6688 ±613.8         | -9742 ±39.15               | -8955 ±39.70     |
| $\Delta S$ | -2.609                     | <sub>1</sub> 27.78<br><sub>2</sub> 10.31                       | 6.328                      | -1.995           |

**Supplemental Table 3. Primers used for experiments.**

| Purpose        | Gene                                     | Name                 | Sequence (5'→3')                                       |
|----------------|------------------------------------------|----------------------|--------------------------------------------------------|
| RT-PCR         | <i>CNGC12</i>                            | F11C10-14-F5         | CGGGTGATACCAGAGTA                                      |
|                |                                          | F11C10-14-R3         | GGAAGGCGAGAACCATT                                      |
|                | <i>NbACTIN</i>                           | NbACT_RT_F1          | CATATGTAGGAGATGAAGCT                                   |
|                |                                          | NbACT_RT_R1          | ATCAGTAAGGTCACGACCAG                                   |
|                | <i>NbPR1a</i>                            | NbPR1a_RT_F1         | AATATCCCCTCTTGTGCG                                     |
|                | NbPR1a_RT_R1                             | CCTGGAGGATCATAGTTG   |                                                        |
|                | <i>NbHSR203J</i>                         | NbHSR203J_RT_F1      | TGCGTCAGCCAAGCTGATTG                                   |
|                |                                          | NbHSR203J_RT_R1      | CCGATAGGACCGCACGAAAC                                   |
| Cloning        | <i>AtCNGC12</i>                          | CNGC12_F_XbaI        | TATCTAGAATGAATCTTCAGAGGAGAAAATTG                       |
|                |                                          | CNGC12_R_nostop_XbaI | TATCTAGAGCTTCAGCCTTTGCAAACCTC                          |
|                |                                          | CNGC12_Sall_F        | TAGTCGACATGAATCTTCAGAGGAG                              |
|                |                                          | CNGC12Nt_NotI_R      | TAGCGGCCGCTTAAGTCTTCTCCAG                              |
|                |                                          | CNGC12-pET28m-F      | AAGCTAGCTCTACTACTAGAGTAGAT                             |
|                |                                          | CNFGC12_R_BaMHI      | TTGGATCCTGCTTCAGCCTTTGC                                |
|                |                                          | CNGC12_626_R         | TTGGATCCGGAACAACCTGCTGTATC                             |
|                |                                          | CNGC12_603_R         | TTGGATCCTGATGCAAGATTGAGTTGC                            |
|                |                                          | CNGC12_593_R         | TTGGATCCAATATTCTCGTTGTCTCTTG                           |
|                |                                          | CNGC12_567_R         | TTGGATCCCCATGAGCGCCATTGCTG                             |
|                |                                          | CNGC12_561_F_NheI    | AAGCTAGCTCACAGCAATGGCGCTCATG                           |
| CNGC12_581_F   | AAGCTAGCAAAAGGAAGCTGTCTAAGAC             |                      |                                                        |
| CNGC12_595_F   | AAGCTAGCCAAGGCACGCAACTCAATC              |                      |                                                        |
| Mutagenesis    | <i>AtCNGC12</i>                          | F-N-term.LK::EE      | AAAATTGAAAAGTGTTAGAGGACGCGAGGAGAAGGTTTACGGGAAGATGAAAAC |
|                |                                          | R-N-term.LK::EE      | GTTTTTCATCTCCCCTAAACCTTCTCTCGCGTCTCTAACACTTTTCAATTTT   |
|                |                                          | CNGC12_IQ572DA_F     | CATGGGCAGCATTCTTCGATGCAGCGGCATGGAGGAAAC                |
|                |                                          | CNGC12_IQ572DA_R     | GTTTCTCCATGCCGCTGCATCGAAGAATGCTGCCCATG                 |
|                |                                          | CNGC12_L605E_F       | CTCAATCTTGCATCAACGGAATACGTGTCCAGATTTGTG                |
|                |                                          | CNGC12_L605E_R       | CACAAATCTGGACACGTATTCCGTTGATGCAAGATTGAG                |
|                |                                          | CNGC12_V607E_F       | CTTGCATCAACGCTCTACGAGTCCAGATTTGTGTCCAAAG               |
| CNGC12_V607E_R | CTTTGGACACAAATCTGGACTCGTAGAGCGTTGATGCAAG |                      |                                                        |
|                | <i>CNGC12_R609E_F</i>                    | CNGC12_R609E_F       | TCAACGCTCTACGTGTCCGAATTTGTGTCCAAAGCTTTG                |
|                |                                          | CNGC12_R609E_R       | CAAAGCTTTGGACACAAATTCGGACACGTAGAGCGTTGA                |
|                | <i>CNGC12_K613E_F</i>                    | CNGC12_K613E_F       | CGTGTCCAGATTTGTGTCCGAAGCTTTGCAAAATCGACG                |
|                |                                          | CNGC12_K613E_R       | CGTCGATTTTGCAAAGCTTCGGACACAAATCTGGACACG                |
